# Supplementary material for: Mitochondrial Ca2+ uniporter haploinsufficiency enhances long-term potentiation at hippocampal mossy fibre synapses
Source: PubMed Central journal article supplement (PMC10563808; doi:10.1242/jcs.259823), 2022-11-23
Supplement: joces-135-259823-s1.pdf [file joces-135-259823-s1.pdf]

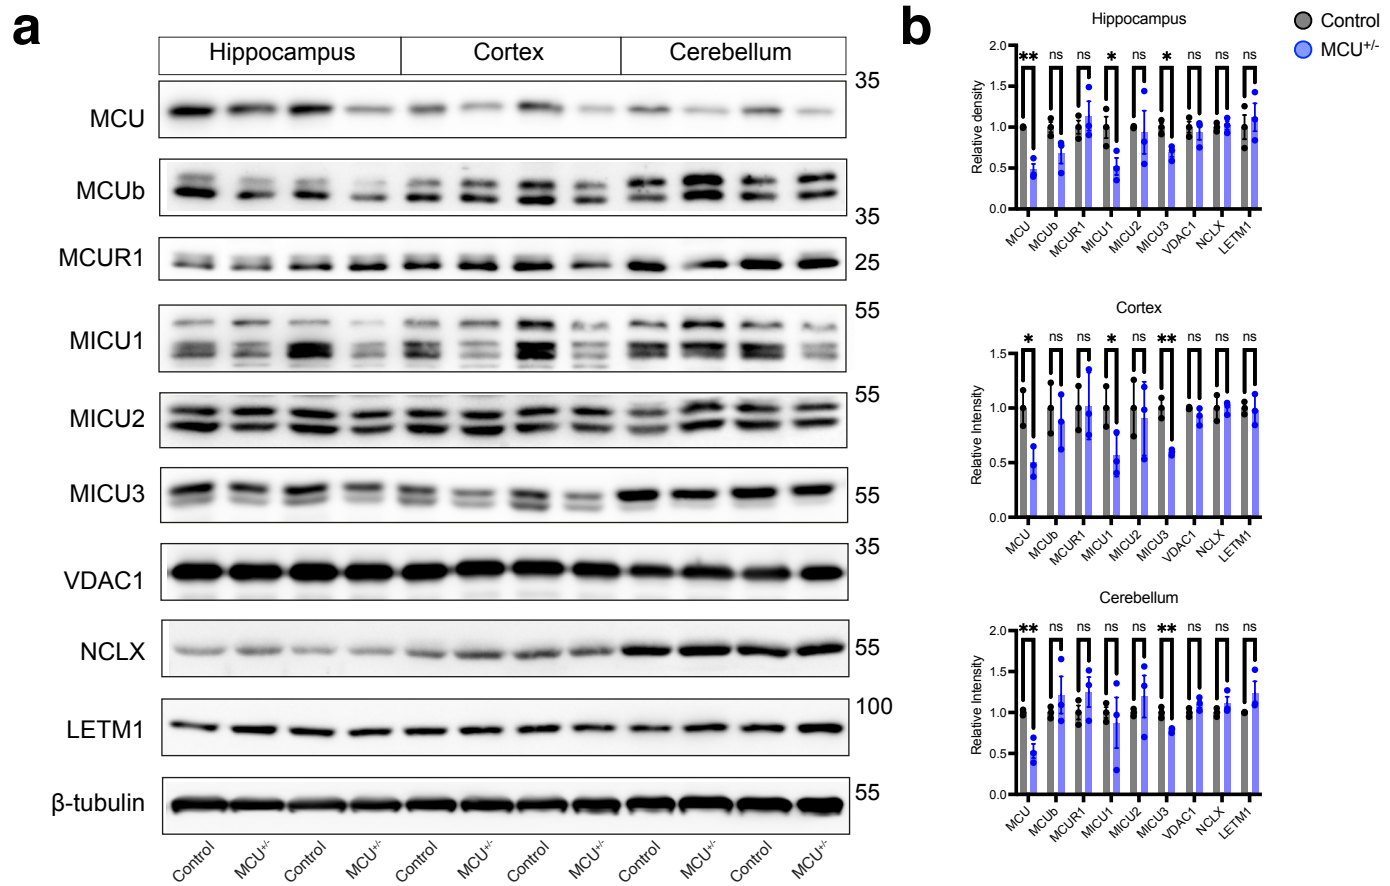

**Fig. S1. Mitochondrial Ca<sup>2+</sup> uptake protein levels in MCU<sup>+/-</sup> animals.**

**a**, Western blot for mitochondrial Ca<sup>2+</sup> uptake proteins in lysate from 6 month old mice (hippocampus, cortex and cerebellum).

**b**, Quantification of protein level, normalised to β-tubulin.

**Hippocampus**,  $n = 3$ , unpaired  $t$ -tests: MCUb  $P = 0.07$ , MCUR1  $P = 0.53$ , MICU1  $*P = 0.046$ , MICU2  $P = 0.83$ , MICU3  $*P = 0.01$ , VDAC1  $P = 0.64$ , NCLX  $P = 0.74$ , LETM1  $P = 0.62$ .

**Cortex**,  $n = 3$ , unpaired  $t$ -tests: MCUb  $P = 0.56$ , MCUR1  $P = 0.93$ , MICU1  $*P = 0.044$ , MICU2  $P = 0.71$ , MICU3  $**P = 0.001$ , VDAC1  $P = 0.16$ , NCLX  $P = 0.97$ , LETM1  $P = 0.85$ .

**Cerebellum**,  $n = 3$ , unpaired  $t$ -tests: MCUb  $P = 0.40$ , MCUR1  $P = 0.28$ , MICU1  $P = 0.71$ , MICU2  $P = 0.49$ , MICU3  $**P = 0.007$ , VDAC1  $P = 0.13$ , NCLX  $P = 0.25$ , LETM1  $P = 0.16$ .

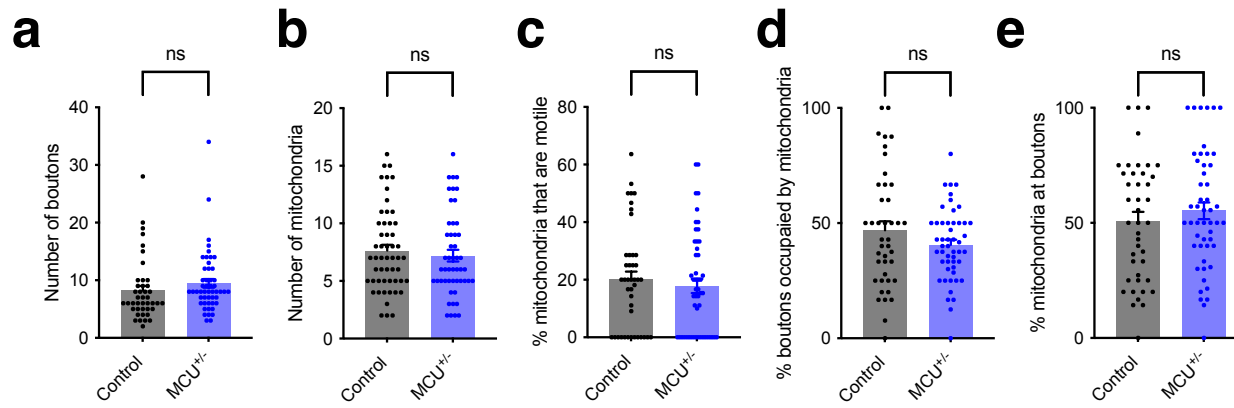

**Fig. S2. Characterisation of individual neurons from MCU<sup>+/-</sup> and control cultures.**

**a**, Number of boutons in control and MCU<sup>+/-</sup> neurons:  $8.2 \pm 0.83$  and  $9.5 \pm 0.76$  respectively,  $n = 42-50$  neurons, unpaired  $t$ -test,  $P = 0.26$ .

**b**, Number of mitochondria in control and MCU<sup>+/-</sup> neurons:  $7.6 \pm 0.50$  and  $7.2 \pm 0.51$  respectively,  $n = 42-50$  neurons, unpaired  $t$ -test,  $P = 0.54$ .

**c**, Percentage of motile mitochondria in control and MCU<sup>+/-</sup> neurons:  $20 \pm 2.8$  and  $18 \pm 2.5$  respectively,  $n = 42-50$  neurons, unpaired  $t$ -test,  $P = 0.56$ .

**d**, Percentage of boutons occupied by mitochondria in control and MCU<sup>+/-</sup> neurons:  $47 \pm 3.9$  and  $41 \pm 2.2$  respectively,  $n = 42-50$  neurons, unpaired  $t$ -test,  $P = 0.39$ .

**e**, Percentage of mitochondria at boutons in control and MCU<sup>+/-</sup> neurons:  $51 \pm 4.0$  and  $55 \pm 3.6$  respectively,  $n = 42-50$  neurons, unpaired  $t$ -test,  $P = 0.41$ .

Experiments were performed in E16 mouse hippocampal neuronal cultures at DIV 10-12. Error bars represent SEM.

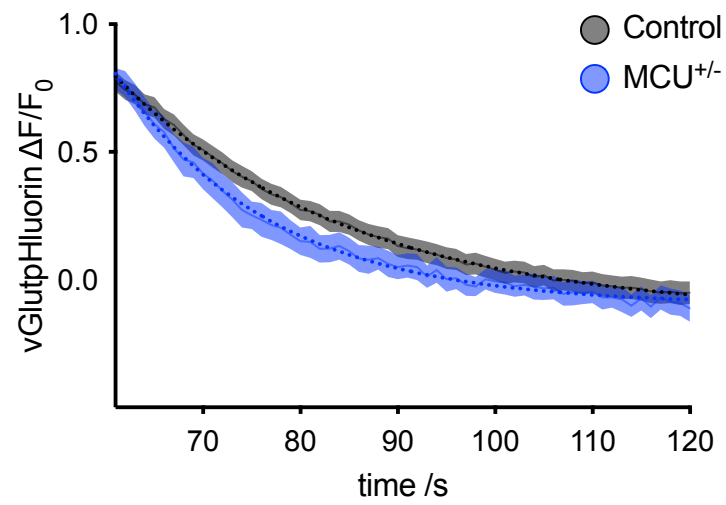

**Fig. S3. MCU heterozygosity accelerates synaptic vesicle endocytosis.**

Average vGlutpHluorin  $\tau$  shown by dotted lines for control (grey) and MCU<sup>+/-</sup> neurons (blue). MCU<sup>+/-</sup>  $\tau$  = 15.72s (95% CI 13.6 to 18.39),  $n$  = 18 neurons; Control  $\tau$  = 23.95s (95% CI 20.72 to 28.18),  $n$  = 36 neurons).  $F$  statistic 13.11 (\*\* $P$  = 0.0003).

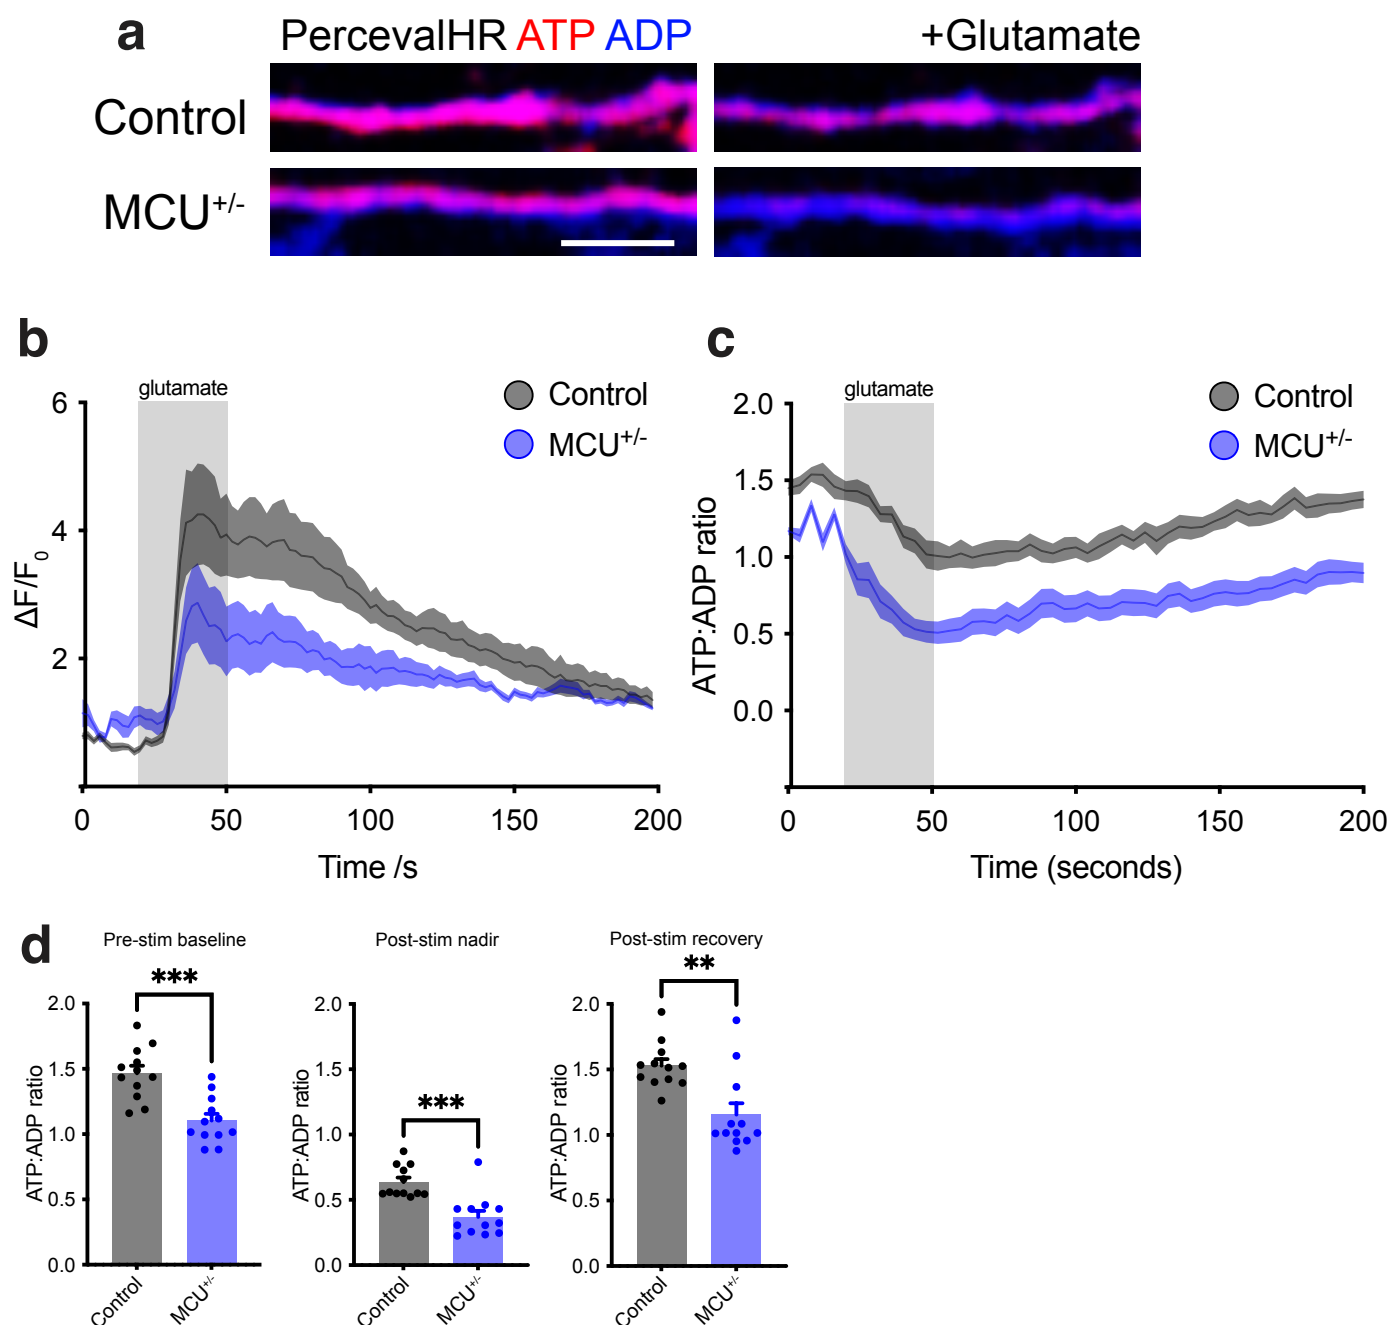

**Fig. S4. ATP availability is reduced in MCU<sup>+/-</sup> neurons.**

**a**, Live images of neurons transfected with PercevalHR before and during glutamate stimulation, shown in false colour. Scale bar, 10  $\mu$ m.

**b**, Average  $\Delta F/F_0$  MitoGCaMP5 traces from control neurons ( $n = 12$ , grey) and MCU<sup>+/-</sup> neurons ( $n = 12$ , blue). Stimulation with glutamate occurred for 30 s ( $t = 20-50$ ).

**c**, Average ATP:ADP ratio (derived from PercevalHR imaging) from control neurons ( $n = 12$ , grey) and MCU<sup>+/-</sup> neurons ( $n = 12$ , blue). Stimulation with glutamate occurred for 30 s ( $t = 20-50$ ).

**d**, Average ATP:ADP ratio (derived from PercevalHR imaging): at baseline prior to glutamate stimulation (Pre-stim baseline), the nadir following glutamate stimulation (Post-stim nadir), and at the end of the imaging period following glutamate stimulation (Post-stim recovery). ATP:ADP ratio was lower in MCU<sup>+/-</sup> neurons at all three time points. Pre-stim baseline, unpaired  $t$ -test, \*\*\* $P = 0.0001$ . Post-stim nadir, unpaired  $t$ -test, \*\*\* $P = 0.0001$ . Post-stim recovery unpaired  $t$ -test, \*\* $P = 0.0013$ .

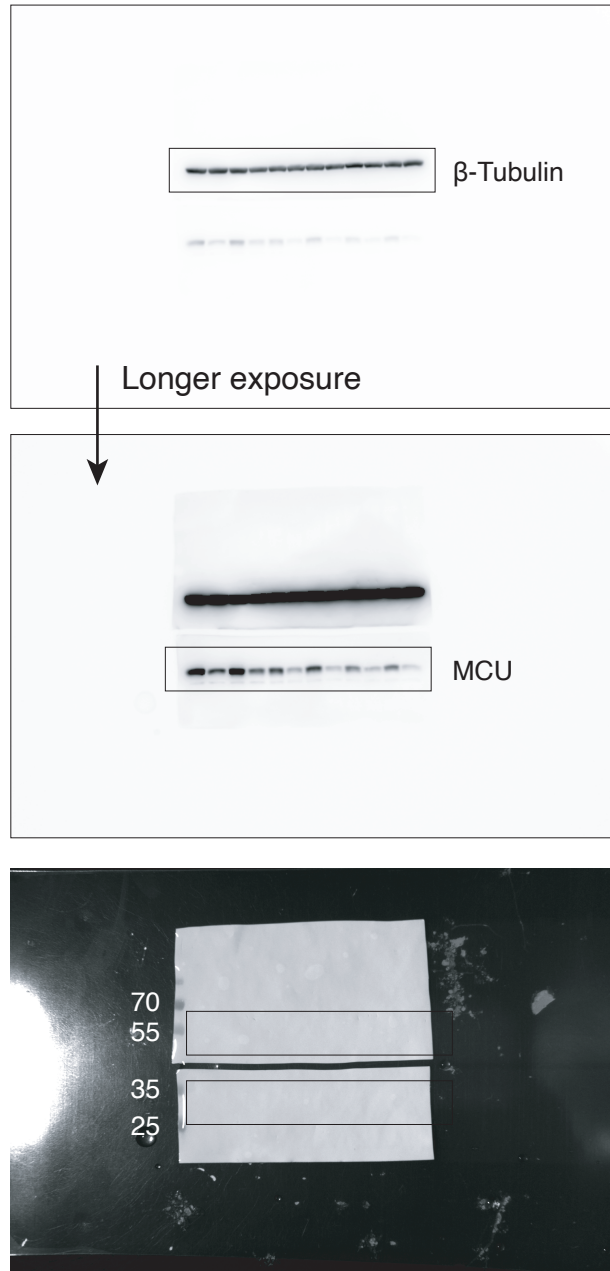

**Fig. S5. Blot Transparency related to Figure 1.**

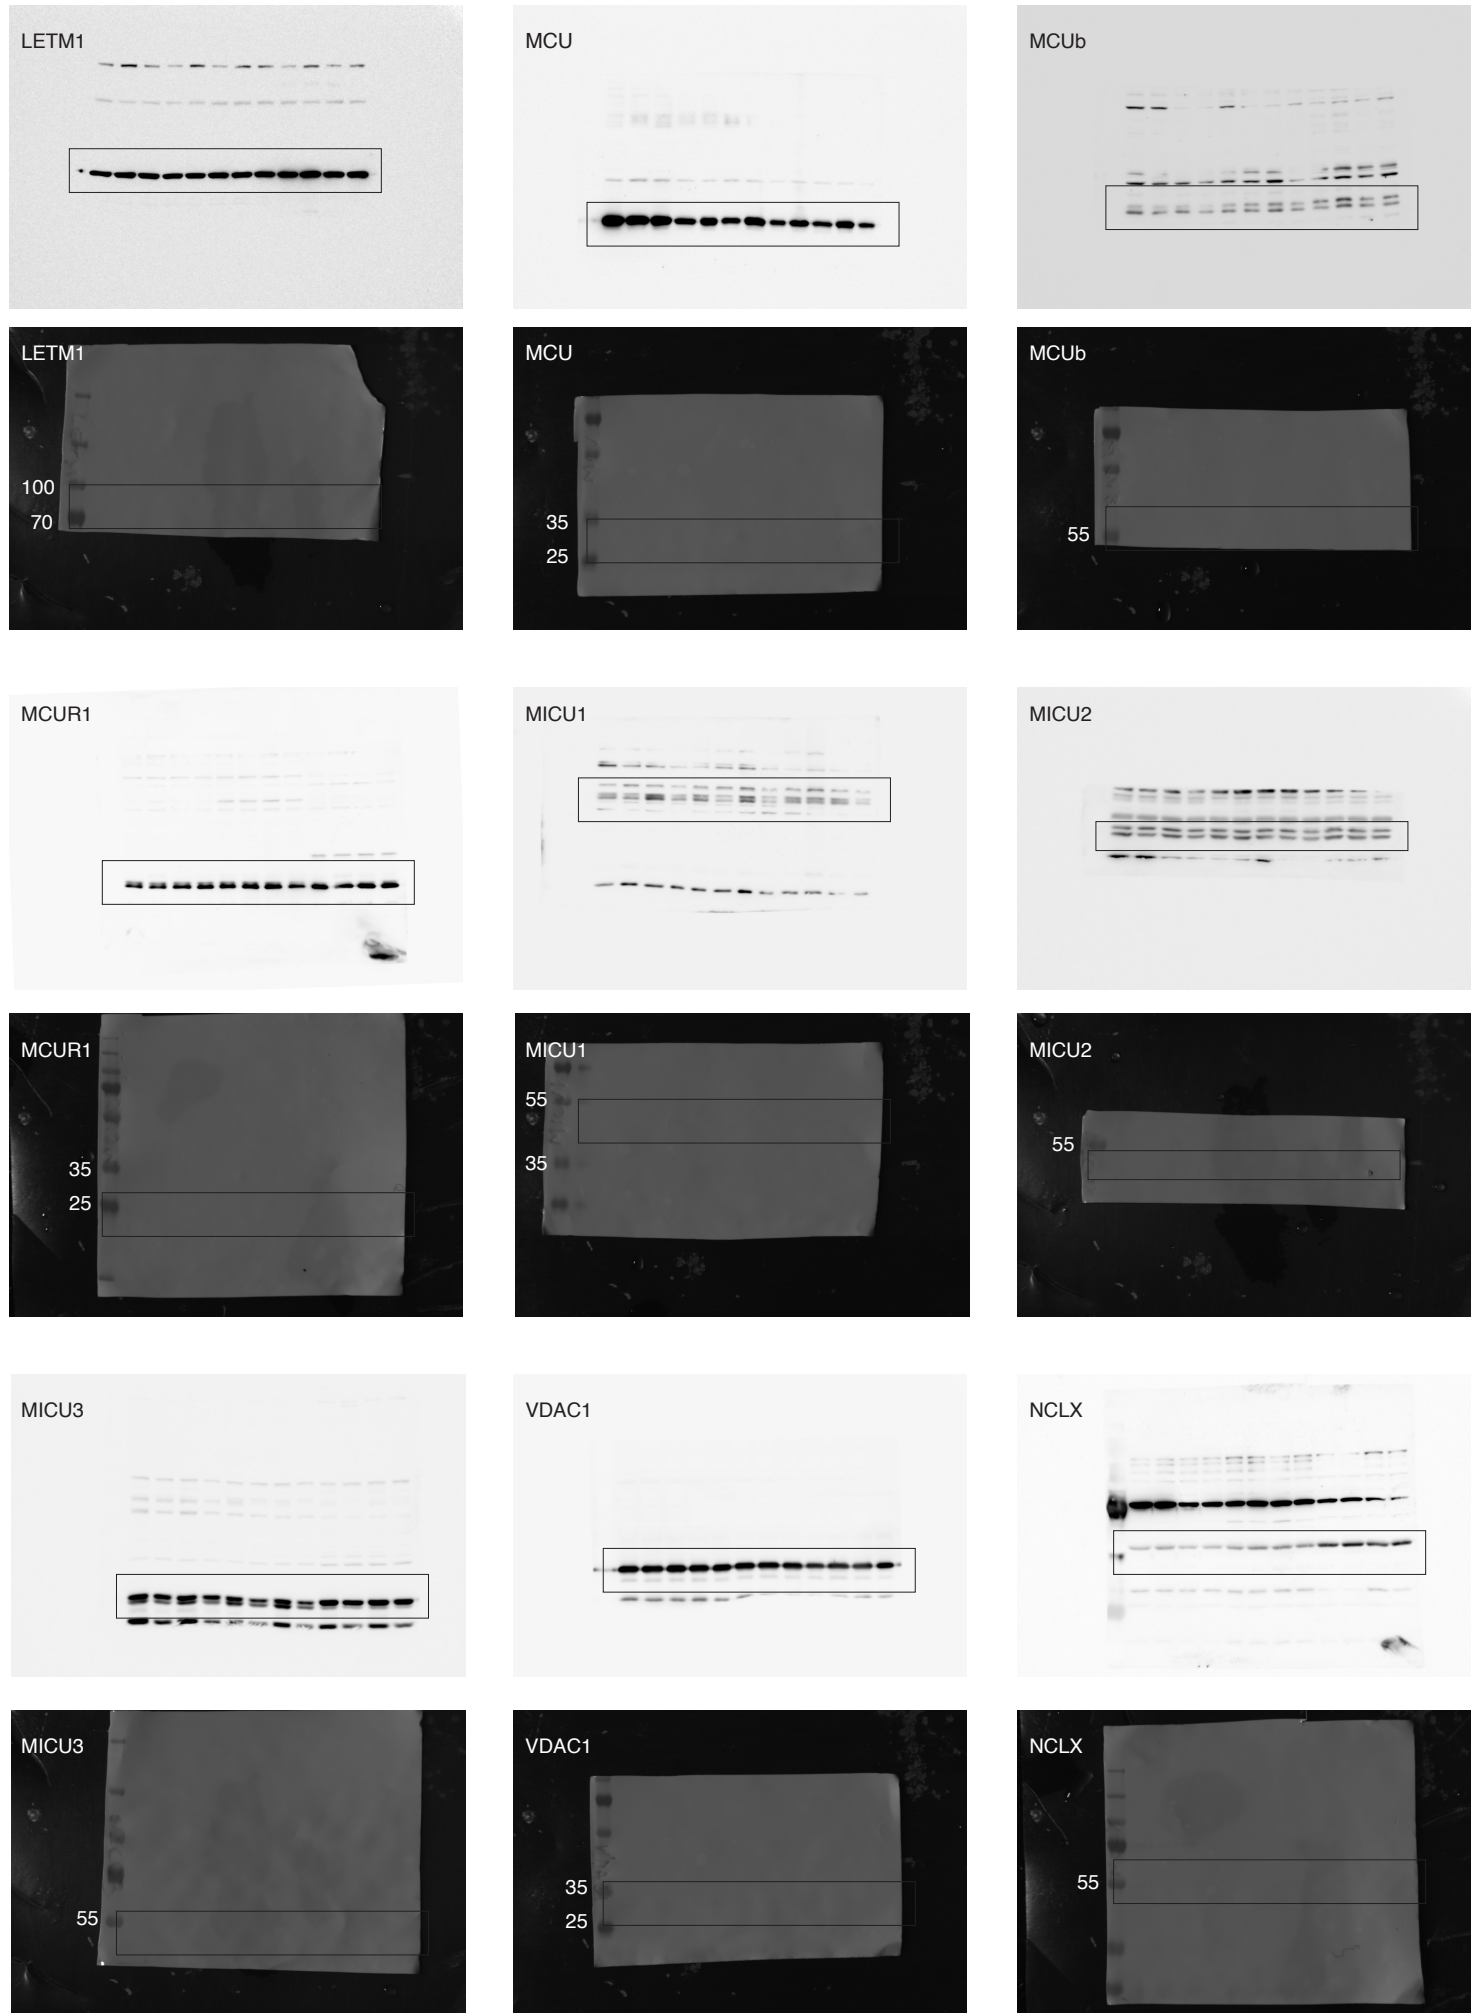

Fig. S6. Blot Transparency related to Supplementary Figure 1.
